# Supplementary material for: Role of the catalyst structure–activity relationship in enhancing the selective oxidation yield of n-butane to maleic anhydride
Source: Royal Society of Chemistry journal article supplement (doi:10.1039/d4cy00023d), 2024-01-01
Supplement: d4cy00023d1.pdf [file d4cy00023d1.pdf]

## Electronic Supporting Material

# Enhancing Selective Oxidation of n-Butane to Maleic Anhydride: Role of Catalyst Structure-Activity Relationship

Muhammad Faizan <sup>1,2</sup>, Erum Aamir <sup>3</sup>, Tiong Sieh Kiong <sup>1</sup>, Hua Song <sup>2,\*</sup>

<sup>1</sup> *Institute of Sustainable Energy, Universiti Tenaga Nasional, 43000, Kajang, Malaysia*

<sup>2</sup> *Department of Chemical and Petroleum Engineering, University of Calgary, Calgary, Alberta T2N 1N4, Canada*

<sup>3</sup> *Institute of Environmental Science and Engineering, National University of Sciences and Technology, Islamabad 44000, Pakistan*

*Corresponding Author: \*E-Mail: sonh@ucalgary.ca. Tel: 403-220-3792. Fax: 403-284-4852. (H. Song)*

## Contents:

**Fig. S1** FT-IR patterns of unpromoted and promoted precursors (a) and catalysts (b).

**Fig. S2** XRD patterns of unpromoted and promoted precursors (a) and catalysts (b).

**Fig. S3** Lamellar thickness of unpromoted (Blank-PVPO) (a<sub>2</sub>) and promoted precursors 1%Mx@VPO (b), 4%Mx@VPO (c) and 5%Mx@VPO (d).

**Fig. S4** The surface morphology of unpromoted (Blank-VPO) and promoted (5%Mx@VPO) catalysts evaluated from the correlation of relative pressure ( $P/P_0$ ) with adsorbed volume ( $\text{cm}^3/\text{g}$ ) (a), pore width (nm) with cumulative pore volume ( $\text{cm}^3/\text{g}$ ) (b) and pore size (nm) with differential pre volume ( $\text{cm}^3/\text{g}$ ) (c) at STP.

**Fig. S5** EDS spectrum of V, P, O, Ti, and C of the 5%Mx@VPO catalyst (a) and their compositional distribution of titanium (b), carbon (c), vanadium (d), phosphorus (e), oxygen (f) and all elements (g) displayed from EDS mapping.

**Fig. S6** The catalytic performance of solvothermal-based 5 %MXene-promoted VPO catalysts at different temperatures. The reagent gas ( $\text{air}/\text{n-C}_4\text{H}_{10} = 1.34 \text{ vol. } \%$ ) was supplied at 0.1~0.15 MPa pressure with a flow rate of  $2000 \text{ h}^{-1} \text{ GHSV}$ .

**Fig. S7** The catalytic performance of ball milling-based 1%MXene-promoted VPO catalysts at different temperatures. The reagent gas ( $\text{air}/\text{n-C}_4\text{H}_{10} = 1.34 \text{ vol. } \%$ ) was supplied at 0.1~0.15 MPa pressure with a flow rate of  $2000 \text{ h}^{-1} \text{ GHSV}$ .

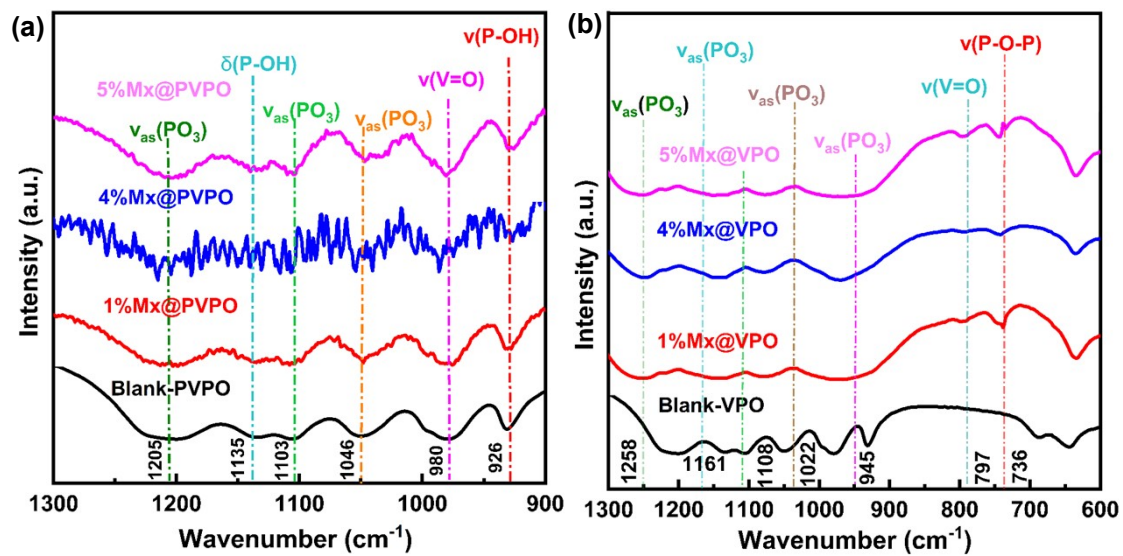

Fig. S1 FT-IR patterns of unpromoted and promoted precursors (a) and catalysts (b).

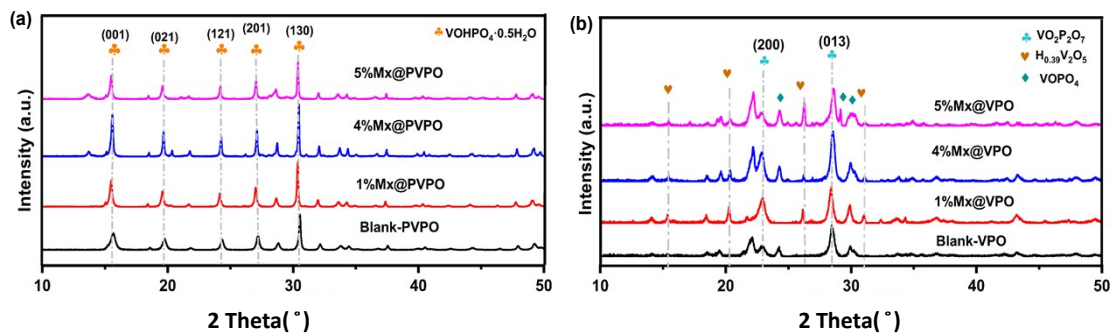

**Fig. S2** XRD patterns of unpromoted and promoted precursors (a) and catalysts (b).

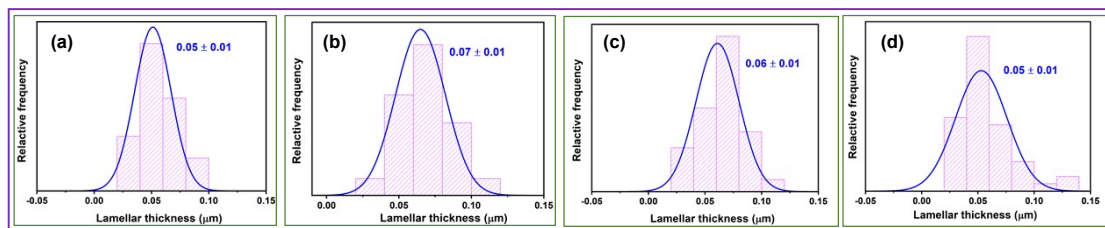

**Fig. S3** Lamellar thickness of unpromoted (Blank-PVPO) (a<sub>2</sub>) and promoted precursors 1%Mx@VPO (b), 4%Mx@VPO (c) and 5%Mx@VPO (d).

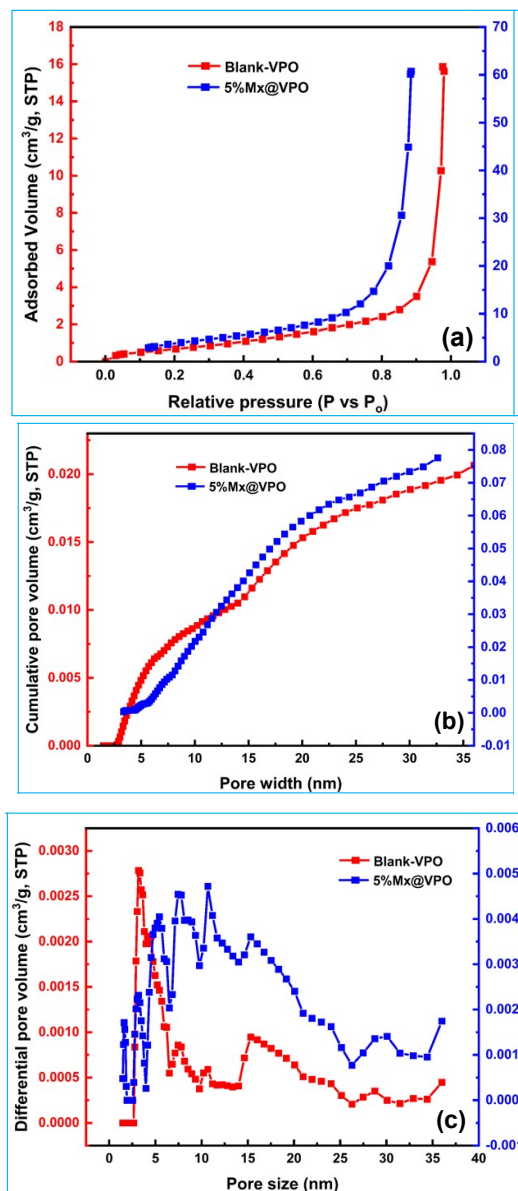

**Fig. S4** The surface morphology of unpromoted (Blank-VPO) and promoted (5%Mx@VPO) catalysts evaluated from the correlation of relative pressure ( $P/P_0$ ) with adsorbed volume ( $\text{cm}^3/\text{g}$ ) (a), pore width (nm) with cumulative pore volume ( $\text{cm}^3/\text{g}$ ) (b) and pore size (nm) with differential pre volume ( $\text{cm}^3/\text{g}$ ) (c) at STP.

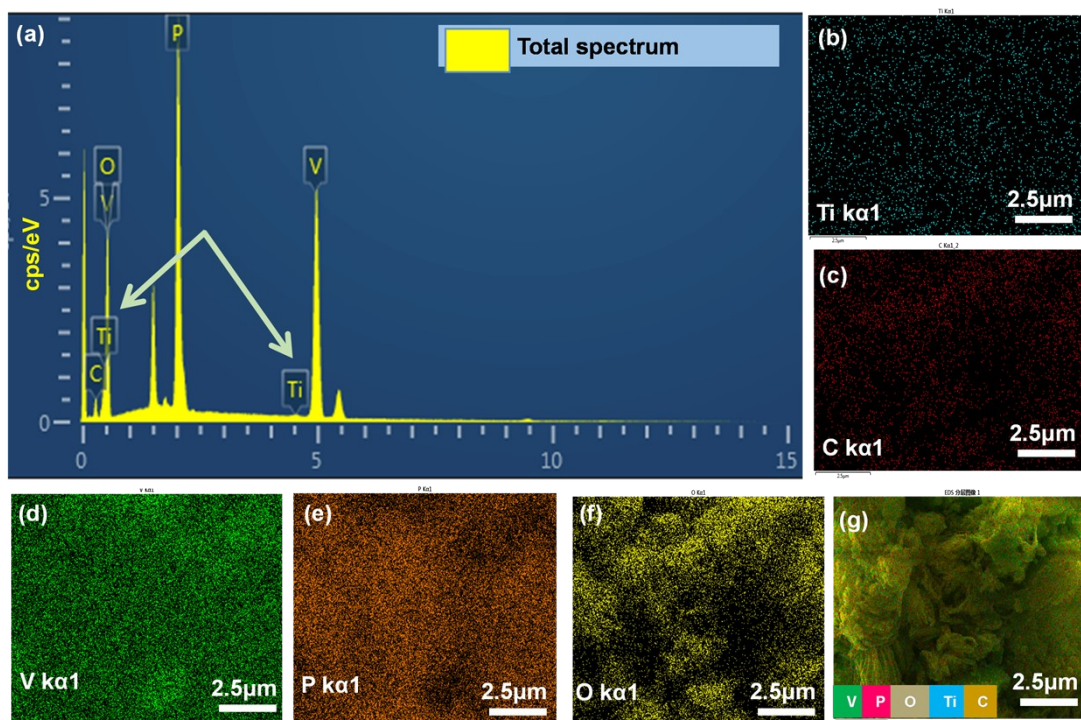

**Fig. S5** EDS spectrum of V, P, O, Ti, and C of the 5%Mx@VPO catalyst (a) and their compositional distribution of titanium (b), carbon (c), vanadium (d), phosphorus (e), oxygen (f) and all elements (g) displayed from EDS mapping.

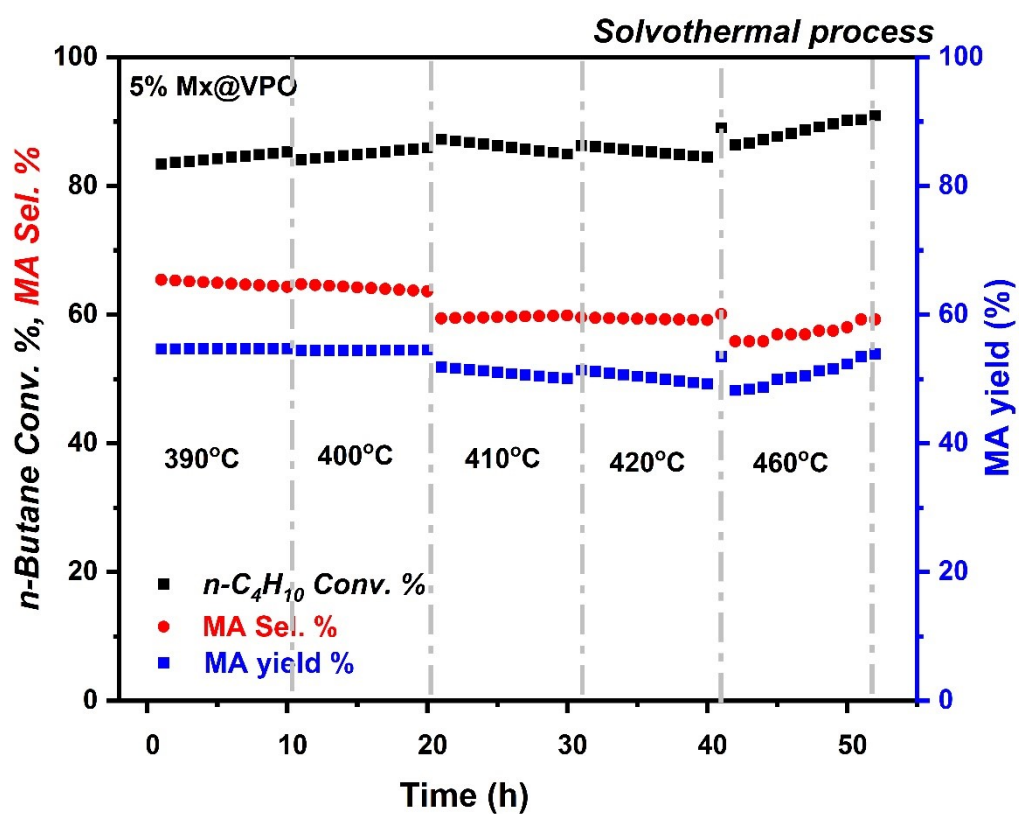

**Fig. S6** The catalytic performance of solvothermal-based 5 %MXene-promoted VPO catalysts at different temperatures. The reagent gas (air/*n*-C<sub>4</sub>H<sub>10</sub> = 1.34 vol. %) was supplied at 0.1~0.15 MPa pressure with a flow rate of 2000 h<sup>-1</sup> GHSV.



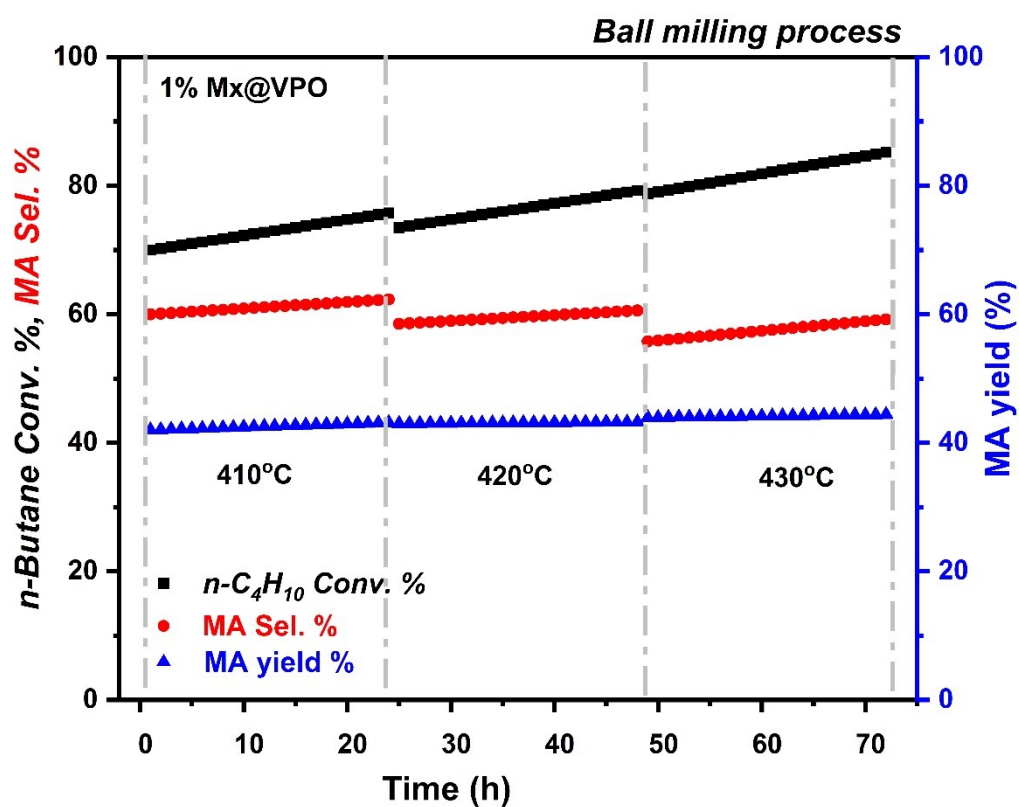

**Fig. S7** The catalytic performance of ball milling-based 1%MXene-promoted VPO catalysts at different temperatures. The reagent gas (air/n-C<sub>4</sub>H<sub>10</sub> = 1.34 vol. %) was supplied at 0.1~0.15 MPa pressure with a flow rate of 2000 h<sup>-1</sup> GHSV.
